# Supplementary material for: Identification of Signaling Pathways for Early Embryonic Lethality and Developmental Retardation in Sephs1−/− Mice
Source: MDPI journal article supplement (doi:10.3390/ijms222111647), 2021-10-28
Supplement: s1 [file s1]

# Supplementary Information

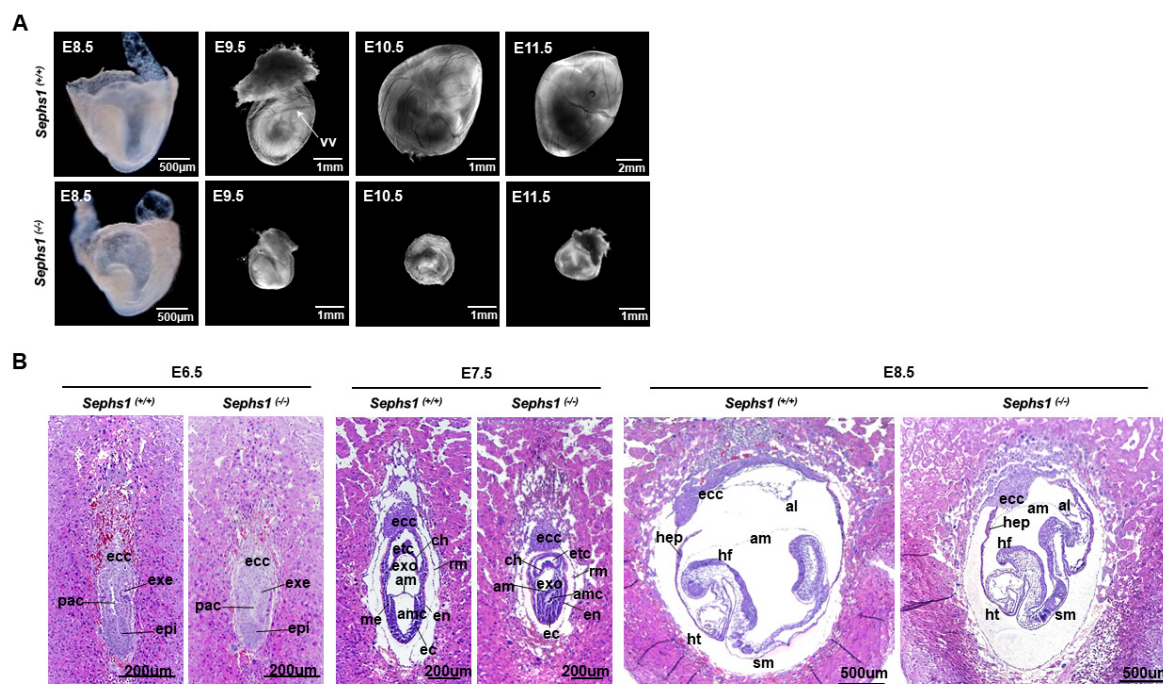

**Figure S1. Morphology of *Sephs1*<sup>-/-</sup> embryos.** (A) Embryos were photographed in the yolk sac immediately after dissection. (B) Paraffin-embedded section of *Sephs1*<sup>-/-</sup> embryo stained with Hematoxylin & eosin stain. exe, extraembryonic region; epi, epiblast; pac, pro-amniotic cavity; ecc, ectoplacental cone; am, amnion; etc, ectoplacental cavity; exo, exocoelomic cavity; amc, amniotic cavity; ec, ectoderm; en, endoderm; me, mesoderm; ch, chorion; hep, hemato-endothelial progenitor; hf, head fold; ht, heart; sm, somite; and al, allantois.

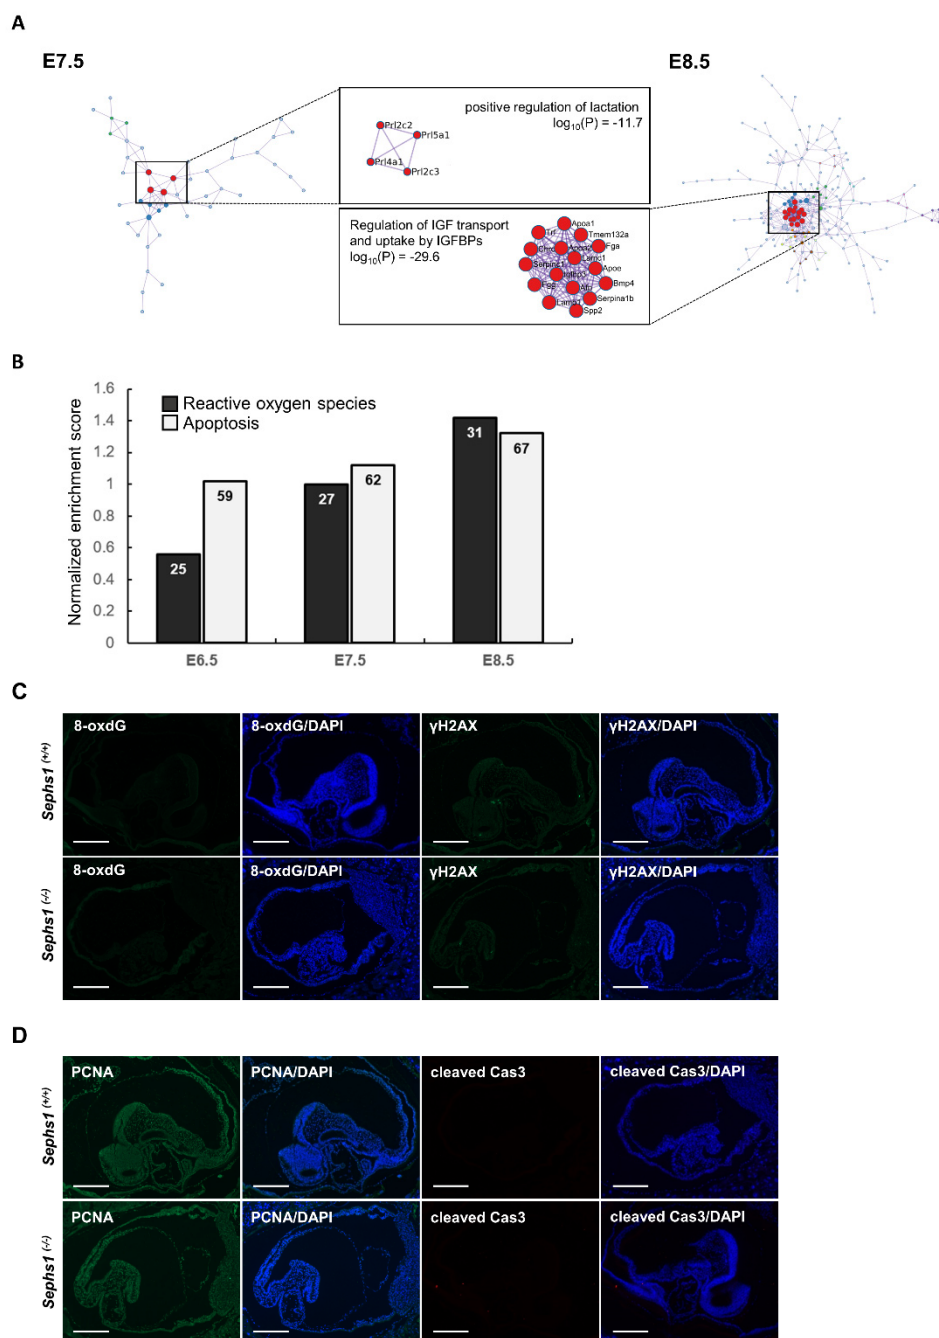

**Figure S2.** PPI analysis and GSEA on ‘Reactive Oxygen Species’ and ‘Apoptosis’ gene sets. **(A)** PPI analysis at E7.5 and E8.5. **(B)** Normalized enrichment score of GSEA with gene sets of ‘Reactive Oxygen Species’ and ‘Apoptosis’. Each number in the bar graph indicates the number of genes in the LES. **(C)** Level of DNA damage induced by oxidative stress markers at E8.5. Scale bars represent 500  $\mu$ m. **(D)** Level of proliferation marker and apoptosis marker at E8.5. Scale bars represent 500  $\mu$ m.

Table S1. Top 25 up-regulated and top 25 down-regulated DEGs lists at E6.5, E7.5 and E8.5.

| Top 25 downregulated at E6.5 |                                                              |          |        | Top 25 upregulated at E6.5 |                                                          |          |        |
|------------------------------|--------------------------------------------------------------|----------|--------|----------------------------|----------------------------------------------------------|----------|--------|
| Gene_symbol                  | Description                                                  | p-val    | log2FC | Gene_symbol                | Description                                              | p-val    | log2FC |
| Hba-a2                       | hemoglobin alpha, adult chain 2                              | 9.81E-03 | -8.78  | Pr14a1                     | prolactin family 4, subfamily a, member 1                | 4.61E+00 | 6.18   |
| Foxc2                        | forkhead box C2                                              | 6.35E-05 | -4.41  | Pr3d2                      | prolactin family 3, subfamily d, member 1                | 4.34E+00 | 4.43   |
| Hsd11b1                      | hydroxysteroid 11-beta dehydrogenase 1                       | 8.33E-04 | -3.94  | Pr15a1                     | prolactin family 5, subfamily a, member 1                | 3.67E+00 | 4.32   |
| Cntnap2                      | contactin associated protein-like 2                          | 9.56E-03 | -3.71  | Pr17a1                     | prolactin family 7, subfamily a, member 1                | 3.73E+00 | 4.10   |
| Vat1l                        | vesicle amine transport protein 1 like                       | 2.50E-04 | -3.45  | Nppb                       | natriuretic peptide type B                               | 3.01E+00 | 3.87   |
| Amica1                       | adhesion molecule, interacts with CXADR antigen 1            | 3.47E-03 | -3.23  | Cts8                       | cathepsin 8                                              | 2.88E+00 | 3.61   |
| Atp6v0d2                     | ATPase, H <sup>+</sup> transporting, lysosomal V0 subunit D2 | 5.72E-03 | -3.12  | Cts7                       | cathepsin 7                                              | 3.36E+00 | 3.53   |
| Rab39b                       | RAB39B, member RAS oncogene family                           | 3.63E-04 | -3.07  | Pip1                       | pore forming protein-like                                | 2.92E+00 | 3.18   |
| Ldhd                         | lactate dehydrogenase D                                      | 6.78E-05 | -3.04  | Bmp8b                      | bone morphogenetic protein 8b                            | 2.23E+00 | 3.09   |
| Ampd3                        | adenosine monophosphate deaminase 3                          | 2.10E-03 | -3.00  | AU018091                   | expressed sequence AU018091                              | 2.45E+00 | 3.03   |
| Mlph                         | melanophilin                                                 | 6.84E-03 | -2.95  | Entpd1                     | ectonucleoside triphosphate diphosphohydrolase 1         | 2.08E+00 | 3.02   |
| Galnt16                      | UDP-N-acetyl-alpha-D-galactosamine:polypeptide N-acetyl      | 3.37E-05 | -2.84  | Ap2c2                      | ATPase, Ca <sup>++</sup> transporting, type 2C, member 2 | 1.65E+00 | 2.95   |
| Fan1                         | FANCD2/FANCI-associated nuclease 1                           | 9.44E-03 | -2.83  | Mmp9                       | matrix metalloproteinase 9                               | 2.69E+00 | 2.90   |
| Htra3                        | HtrA serine peptidase 3                                      | 6.39E-04 | -2.83  | Adm                        | adrenomedullin                                           | 2.66E+00 | 2.84   |
| Nlgn3                        | neuroligin 3                                                 | 4.02E-03 | -2.77  | Duoax2                     | dual oxidase maturation factor 2                         | 1.92E+00 | 2.80   |
| Gpmnb                        | glycoprotein (transmembrane) nmb                             | 1.14E-03 | -2.76  | Rhox1                      | reproductive homeobox 1                                  | 1.48E+00 | 2.68   |
| Spr2g                        | small proline-rich protein 2G                                | 4.11E-03 | -2.75  | Scin                       | scinderin                                                | 2.19E+00 | 2.56   |
| Erv3                         | endogenous retroviral sequence 3                             | 6.81E-03 | -2.70  | Igfb3                      | integrin beta 3                                          | 1.82E+00 | 2.55   |
| Acss1                        | acyl-CoA synthetase short-chain family member 1              | 5.04E-03 | -2.65  | Gjb5                       | gap junction protein, beta 5                             | 2.20E+00 | 2.54   |
| Wnt3a                        | wingless-type MMTV integration site family, member 3A        | 8.36E-04 | -2.65  | Gjb3                       | gap junction protein, beta 3                             | 2.18E+00 | 2.54   |
| Prp1                         | proline-rich acidic protein 1                                | 6.91E-04 | -2.54  | Gpx1                       | glutathione peroxidase 1                                 | 4.88E-01 | 2.49   |
| Rbm24                        | RNA binding motif protein 24                                 | 2.54E-03 | -2.50  | Gm1673                     | predicted gene 1673                                      | 1.97E+00 | 2.47   |
| Nolo                         | nolochord homeobox                                           | 8.77E-04 | -2.43  | Elf5                       | E74-like factor 5                                        | 2.25E+00 | 2.39   |
| Tmem213                      | transmembrane protein 213                                    | 1.99E-03 | -2.42  | Tacs1d2                    | tumor-associated calcium signal transducer 2             | 1.83E+00 | 2.36   |
| Heph1l                       | hephaestin-like 1                                            | 4.89E-03 | -2.36  | Plau                       | plasminogen activator, urokinase                         | 1.41E+00 | 2.32   |

  

| Top 25 downregulated at E7.5 |                                                              |          |        | Top 25 upregulated at E7.5 |                                                               |          |        |
|------------------------------|--------------------------------------------------------------|----------|--------|----------------------------|---------------------------------------------------------------|----------|--------|
| Gene_symbol                  | Description                                                  | p-val    | log2FC | Gene_symbol                | Description                                                   | p-val    | log2FC |
| Slmn2                        | stathmin-like 2                                              | 2.18E-03 | -6.76  | Pr12c3                     | prolactin family 2, subfamily c, member 3                     | 2.69E+00 | 5.92   |
| Tmem176a                     | transmembrane protein 176A                                   | 2.67E-03 | -5.50  | Slc6a2                     | solute carrier family 6 (neurotransmitter transporter, noradn | 2.12E+00 | 5.07   |
| Vat1l                        | vesicle amine transport protein 1 like                       | 1.29E-04 | -5.33  | Pr14a1                     | prolactin family 4, subfamily a, member 1                     | 3.36E+00 | 4.95   |
| Tmem100                      | transmembrane protein 100                                    | 3.45E-03 | -4.92  | Ceacam9                    | carcinoembryonic antigen-related cell adhesion molecule 9     | 1.81E+00 | 4.65   |
| Tmem35                       | transmembrane protein 35                                     | 1.14E-04 | -4.78  | Cts8                       | cathepsin 8                                                   | 2.44E+00 | 4.65   |
| Them6                        | thioesterase superfamily member 6                            | 2.72E-03 | -4.63  | Grem2                      | gremlin 2, DAN family BMP antagonist                          | 1.75E+00 | 4.54   |
| Rtn4r2                       | reticulon 4 receptor-like 2                                  | 4.59E-03 | -4.41  | Igf1bp1                    | insulin-like growth factor binding protein 1                  | 3.13E+00 | 4.32   |
| Cntnap2                      | contactin associated protein-like 2                          | 3.65E-03 | -4.35  | Thbd                       | thrombospondin                                                | 2.61E+00 | 4.30   |
| Rab39b                       | RAB39B, member RAS oncogene family                           | 7.88E-04 | -4.11  | Mmp1a                      | matrix metalloproteinase 1a (interstitial collagenase)        | 2.52E+00 | 4.30   |
| Maneal                       | mannosidase, endo-alpha-like                                 | 7.26E-04 | -3.95  | Pr17a1                     | prolactin family 7, subfamily a, member 1                     | 3.52E+00 | 4.00   |
| Tmem132a                     | transmembrane protein 132A                                   | 2.06E-03 | -3.70  | Psg22                      | pregnancy-specific glycoprotein 22                            | 2.59E+00 | 3.95   |
| Mlbp2                        | microfibrillar-associated protein 2                          | 3.24E-03 | -3.64  | Pip1                       | pore forming protein-like                                     | 2.80E+00 | 3.91   |
| Adck2                        | aarF domain containing kinase 2                              | 1.06E-03 | -3.60  | Lama1                      | laminin, alpha 1                                              | 3.65E+00 | 3.86   |
| Gsta4                        | glutathione S-transferase, alpha 4                           | 1.51E-03 | -3.05  | Cts7                       | cathepsin 7                                                   | 3.27E+00 | 3.82   |
| Mlbp1                        | mitochondrial fission process 1                              | 8.83E-03 | -3.02  | Pr15a1                     | prolactin family 5, subfamily a, member 1                     | 2.63E+00 | 3.72   |
| Vash1                        | vasohibin 1                                                  | 3.61E-03 | -2.78  | Mmp9                       | matrix metalloproteinase 9                                    | 2.88E+00 | 3.70   |
| Ghdc                         | GH3 domain containing                                        | 7.18E-04 | -2.74  | Serpina1b                  | serine (or cysteine) peptidase inhibitor, clade A, member 1   | 1.98E+00 | 3.57   |
| Lrn3                         | leucine rich repeat and fibronectin type III domain containi | 6.81E-03 | -2.71  | Hs3st1                     | heparan sulfate (glucosamine) 3-O-sulfotransferase 1          | 2.69E+00 | 3.47   |
| Fkbp10                       | FK506 binding protein 10                                     | 8.86E-03 | -2.68  | Ceacam15                   | carcinoembryonic antigen-related cell adhesion molecule 1     | 2.70E+00 | 3.42   |
| Ppp1r1a                      | protein phosphatase 1, regulatory (inhibitor) subunit 1A     | 5.72E-03 | -2.62  | Nid1                       | nidogen 1                                                     | 3.15E+00 | 3.34   |
| Vwa5a                        | von Willebrand factor A domain containing 5A                 | 5.18E-03 | -2.57  | Pr12c2                     | prolactin family 2, subfamily c, member 2                     | 2.69E+00 | 3.24   |
| Sh3gl2                       | SH3-domain GRB2-like 2                                       | 1.51E-03 | -2.55  | Srgn                       | serglycin                                                     | 2.99E+00 | 3.20   |
| Gng3                         | guanine nucleotide binding protein (G protein), gamma 3      | 1.55E-03 | -2.52  | Adm                        | adrenomedullin                                                | 2.93E+00 | 3.14   |
| Fut10                        | fucosyltransferase 10                                        | 9.09E-04 | -2.45  | Hbb-bh1                    | hemoglobin Z, beta-like embryonic chain                       | 2.61E+00 | 2.95   |
| Nlgn3                        | neuroligin 3                                                 | 8.56E-03 | -2.39  | Cdh5                       | cadherin 5                                                    | 2.83E+00 | 2.85   |

  

| Top 25 downregulated at E8.5 |                                                               |          |        | Top 25 upregulated at E8.5 |                                                                 |          |        |
|------------------------------|---------------------------------------------------------------|----------|--------|----------------------------|-----------------------------------------------------------------|----------|--------|
| Gene_symbol                  | Description                                                   | p-val    | log2FC | Gene_symbol                | Description                                                     | p-val    | log2FC |
| Tmem176b                     | transmembrane protein 176B                                    | 7.39E-03 | -5.41  | Pr12c4                     | prolactin family 2, subfamily c, member 4                       | 4.70E-03 | 10.02  |
| Vat1l                        | vesicle amine transport protein 1 like                        | 3.16E-03 | -5.29  | Orm2                       | orosomucoid 2                                                   | 5.20E-03 | 5.49   |
| Serpinf1                     | serine (or cysteine) peptidase inhibitor, clade F, member 1   | 3.05E-03 | -5.13  | Heph1l                     | hephaestin-like 1                                               | 1.46E-04 | 5.40   |
| Cntnap2                      | contactin associated protein-like 2                           | 5.18E-03 | -5.00  | Erv3                       | endogenous retroviral sequence 3                                | 2.03E-03 | 4.91   |
| Fxyd3                        | FXD domain-containing ion transport regulator 3               | 7.04E-03 | -4.69  | Klk7                       | kallikrein related-peptidase 7 (chymotryptic, stratum corneu    | 5.08E-03 | 4.76   |
| Ghdc                         | GH3 domain containing                                         | 5.08E-03 | -4.31  | PscA                       | prostate stem cell antigen                                      | 4.86E-04 | 4.49   |
| Tmem176a                     | transmembrane protein 176A                                    | 6.16E-03 | -4.14  | Pr18a2                     | prolactin family 8, subfamily a, member 2                       | 1.55E-04 | 4.21   |
| Slc6a2                       | solute carrier family 6 (neurotransmitter transporter, noradn | 1.76E-06 | -3.92  | Htra3                      | HtrA serine peptidase 3                                         | 5.11E-04 | 3.90   |
| Galnt16                      | UDP-N-acetyl-alpha-D-galactosamine:polypeptide N-acetyl       | 4.50E-03 | -3.87  | Gpmnb                      | glycoprotein (transmembrane) nmb                                | 2.33E-03 | 3.87   |
| Chrd1l                       | chordin-like 1                                                | 6.77E-04 | -3.46  | Htra1                      | HtrA serine peptidase 1                                         | 6.06E-04 | 3.74   |
| Pr14a1                       | prolactin family 4, subfamily a, member 1                     | 2.93E-03 | -3.38  | Gp1hbp1                    | GPI-anchored HDL-binding protein 1                              | 8.00E-04 | 3.72   |
| Rtn4r2                       | reticulon 4 receptor-like 2                                   | 9.25E-03 | -3.23  | Adamts5                    | a disintegrin-like and metalloproteinase (reprolys in type) wit | 3.66E-04 | 3.37   |
| Hsd3b6                       | hydroxy-delta-5-steroid dehydrogenase, 3 beta- and steroid    | 2.09E-03 | -3.17  | Mlbp5                      | microfibrillar associated protein 5                             | 3.62E-03 | 3.25   |
| Mlbp1                        | mitochondrial fission process 1                               | 1.12E-03 | -3.09  | Il1r2                      | interleukin 1 receptor, type II                                 | 3.86E-03 | 3.22   |
| Them6                        | thioesterase superfamily member 6                             | 4.68E-03 | -3.09  | Ctla2a                     | cytotoxic T lymphocyte-associated protein 2 alpha               | 6.35E-03 | 2.86   |
| Lox1                         | lysyl oxidase-like 1                                          | 1.02E-03 | -2.99  | A2m                        | alpha-2-macroglobulin                                           | 3.28E-04 | 2.76   |
| Dnase113                     | deoxyribonuclease 1-like 3                                    | 8.09E-03 | -2.97  | Lipg                       | lipase, endothelial                                             | 6.87E-03 | 2.67   |
| Adck2                        | aarF domain containing kinase 2                               | 2.04E-03 | -2.95  | Psap                       | prosaposin                                                      | 5.88E-04 | 2.64   |
| Tmem132a                     | transmembrane protein 132A                                    | 1.41E-03 | -2.84  | Spr2g                      | small proline-rich protein 2G                                   | 1.47E-03 | 2.55   |
| Thbd                         | thrombospondin                                                | 8.01E-04 | -2.52  | Krt20                      | keratin 20                                                      | 4.62E-03 | 2.32   |
| Lama1                        | laminin, alpha 1                                              | 9.63E-04 | -2.47  | Fabp4                      | fatty acid binding protein 4, adipocyte                         | 6.20E-03 | 2.21   |
| Cyp17a1                      | cytochrome P450, family 17, subfamily a, polypeptide 1        | 9.33E-03 | -2.45  | Rbp2                       | retinol binding protein 2, cellular                             | 7.18E-03 | 2.03   |
| Msh3                         | msh homeobox 3                                                | 2.75E-04 | -2.44  | S100a8                     | S100 calcium binding protein A8 (calgranulin A)                 | 4.10E-03 | 2.01   |
| Grem2                        | gremlin 2, DAN family BMP antagonist                          | 8.25E-04 | -2.43  | Accl12                     | amine oxidase copper containing 1-like 2                        | 8.27E-03 | 1.96   |
| Arifp5                       | ADP-ribosylation factor-like 6 interacting protein 5          | 1.80E-03 | -2.43  | Ambp                       | alpha 1 microglobulin/bikunin                                   | 4.94E-03 | 1.96   |

**Table S2.** Canonical pathways obtained from IPA

| Embryonic Day | Name                                                                       | $\log_{10}(p)^*$ | Z score | LXR/RXR/FXR Gene list                                                                                                                                                                           |
|---------------|----------------------------------------------------------------------------|------------------|---------|-------------------------------------------------------------------------------------------------------------------------------------------------------------------------------------------------|
| E6.5          | LXR/RXR Activation                                                         | -8.93            | 2.27    | APOA1, APOA2, APOA4, APOC2, APOM, C3, FGA, IL1R1, KNG1, LPL, LY96, MMP9, NFKB1, NOS2, PLTP, RBP4, S100A8, SERPINF1, SERPINF2, TF, TTR                                                           |
|               | Coagulation System                                                         | -6.75            | 1.90    | A2M, FGA, FGB, FGG, KNG1, PLAU, PLAUR, SERPINE1, SERPINF2, THBD                                                                                                                                 |
|               | Regulation Of The Epithelial Mesenchymal Transition In Development Pathway | -6.62            | -2.84   | APH1B, FZD3, GLI1, JAG1, NFKB1, S100A4, SNAI2, TWIST1, WNT2, WNT2B, WNT3A, WNT5A, WNT6, WNT7B, WNT8A                                                                                            |
| E7.5          | Coagulation System                                                         | -11.90           | 1.29    | F2, F3, FGA, FGB, FGG, PLAT, PLAU, PLAUR, PLG, PROS1, SERPINA1, SERPINC1, SERPINF2, TFPI, THBD                                                                                                  |
|               | LXR/RXR Activation                                                         | -7.86            | 2.63    | ABCA1, AMBP, APOA1, APOA2, APOA4, APOB, APOC2, FGA, GC, IL1R2, LCAT, LPL, LYZ, MMP9, NGFR, PLTP, RBP4, SERPINA1, SERPINF2, TF, TTR                                                              |
|               | LPS/IL-1 Mediated Inhibition of RXR Function                               | -5.59            | -1.16   | ABCA1, ABCC2, ABCC4, ACOX1, APOC2, CHST11, CHST3, Cyp2d26, FABP1, FABP2, FABP3, FMO1, FMO4, GSTM2, Gstm3, GSTM4, GSTM5, HS3ST1, IL1R2, LIPC, MAOB, MAP2K7, MYD88, NGFR, PLTP, PPARGC1B, SULT1E1 |
| E8.5          | Coagulation System                                                         | -7.20            | -1.00   | A2M, F3, F5, FGA, FGG, KNG1, SERPINA1, SERPINF2, THBD                                                                                                                                           |
|               | LXR/RXR Activation                                                         | -6.87            | 1.29    | AMBP, APOA2, APOA4, FGA, IL1R2, IL33, KNG1, LBP, RXRG, S100A8, SERPINA1, SERPINF1, SERPINF2, TF, TNFRSF1A                                                                                       |
|               | Acute Phase Response Signaling                                             | -5.72            | 1.60    | ADAMTS5, CEBPB, CTNNA2, DCN, DDIT4, DDR2, FGF18, FZD9, GLI1, GREM1, HTRA1, IL1R2, ITGA2B, PTH1R, S100A8, SPHK1, Tcf7, TNFRSF1A, WNT8A                                                           |

\* Pathways with  $\log_{10}(p) < -5$  were selected.

**Table S3.** List of genes in LES obtained from GSEA on 'Reactive Oxygen Species'.

| Total       |          | E6.5        |          | E7.5        |          | E8.5        |          |
|-------------|----------|-------------|----------|-------------|----------|-------------|----------|
| Gene symbol | RM score |
| GLRX        | 1.221    | PRDX6       | 1.044    | PRDX6       | 1.727    | GLRX        | 1.515    |
| PRDX6       | 0.665    | GLRX        | 0.97     | PRDX2       | 1.264    | NDUFB4      | 0.595    |
| PRDX2       | 0.598    | PRDX2       | 0.835    | MGST1       | 1.251    | HMOX2       | 0.518    |
| NDUFS2      | 0.294    | GPX3        | 0.684    | GLRX        | 1.241    | PTPA        | 0.307    |
| NDUFB4      | 0.278    | HHEX        | 0.543    | NDUFB4      | 0.822    | SOD2        | 0.266    |
| HHEX        | -0.154   | NDUFB4      | 0.314    | FES         | 0.81     | GPX4        | -0.261   |
| MSRA        | -0.16    | SCAF4       | 0.283    | MBP         | 0.627    | GCLC        | -0.275   |
| SELENOS     | -0.168   | EGLN2       | -0.363   | NDUFS2      | 0.52     | STK25       | -0.277   |
| LAMTOR5     | -0.178   | ATOX1       | -0.363   | ERCC2       | 0.4      | LAMTOR5     | -0.28    |
| ATOX1       | -0.196   | PRDX1       | -0.399   | ABCC1       | 0.384    | GCLM        | -0.315   |
| SCAF4       | -0.224   | GSR         | -0.426   | GSR         | -0.3     | MBP         | -0.319   |
| PRDX1       | -0.231   | PTPA        | -0.457   | SOD1        | -0.39    | MSRA        | -0.329   |
| SRXN1       | -0.248   | GPX4        | -0.46    | SCAF4       | -0.489   | FTL         | -0.341   |
| GPX4        | -0.289   | LAMTOR5     | -0.478   | TXN         | -0.544   | NDUFA6      | -0.411   |
| PRNP        | -0.32    | CAT         | -0.492   | CDKN2D      | -0.592   | SBNO2       | -0.422   |
| TXN         | -0.34    | PDLIM1      | -0.61    | PFKP        | -0.619   | GSR         | -0.427   |
| GSR         | -0.365   | CDKN2D      | -0.707   | LSP1        | -0.684   | CAT         | -0.435   |
| CAT         | -0.478   | SOD1        | -0.72    | TXNRD1      | -0.726   | ATOX1       | -0.464   |
| GCLM        | -0.498   | FTL         | -0.843   | GCLM        | -0.777   | SCAF4       | -0.478   |
| PFKP        | -0.542   | PFKP        | -0.895   | TXNRD2      | -0.896   | FES         | -0.578   |
| PDLIM1      | -0.577   | TXNRD1      | -0.916   | FTL         | -0.904   | CDKN2D      | -0.592   |
| TXNRD1      | -0.597   | GCLM        | -0.949   | CAT         | -0.986   | PRDX1       | -0.633   |
| SOD1        | -0.602   | TXNRD2      | -1.28    | PDLIM1      | -1.179   | SOD1        | -0.696   |
| CDKN2D      | -0.635   | JUNB        | -1.657   | NQO1        | -1.216   | TXN         | -0.727   |
| FTL         | -0.707   | NQO1        | -2.043   | GPX3        | -1.416   | HHEX        | -0.891   |
| JUNB        | -0.744   |             |          | JUNB        | -2.065   | TXNRD2      | -0.905   |
| TXNRD2      | -0.914   |             |          | SRXN1       | -2.342   | JUNB        | -1.008   |
| NQO1        | -1.303   |             |          |             |          | SRXN1       | -1.281   |
|             |          |             |          |             |          | GPX3        | -1.3     |
|             |          |             |          |             |          | PRNP        | -2.155   |
|             |          |             |          |             |          | NQO1        | -2.641   |

\* RM score; rank metric score.



**Table S4.** List of genes in LES obtained from GSEA on ‘Apoptosis’.

| Total       |          | E6.5        |          | E7.5        |          | E8.5        |          |
|-------------|----------|-------------|----------|-------------|----------|-------------|----------|
| Gene symbol | RM score |
| MADD        | 1.425    | MADD        | 2.905    | MADD        | 3.048    | LMNA        | 2.225    |
| CCND1       | 1.117    | CCND2       | 2.735    | CD44        | 2.032    | FEZ1        | 2.091    |
| CASP8       | 1.057    | CD44        | 2.344    | BMF         | 1.587    | EMP1        | 2.08     |
| PPP2R5B     | 0.786    | ATF3        | 1.744    | CASP8       | 1.307    | CD44        | 1.921    |
| CD44        | 0.732    | CASP8       | 1.468    | CCND1       | 1.154    | SATB1       | 1.883    |
| CASP3       | 0.669    | LEF1        | 1.353    | PPP2R5B     | 1.126    | CAV1        | 1.581    |
| BMF         | 0.669    | BMF         | 1.316    | CDKN1B      | 1.028    | MADD        | 1.537    |
| CDKN1B      | 0.589    | CDKN1B      | 1.257    | CASP3       | 1.017    | BMF         | 1.129    |
| LEF1        | 0.549    | F2R         | 1.245    | BIK         | 0.969    | CCND1       | 1.089    |
| PAK1        | 0.459    | SAT1        | 1.203    | DIABLO      | 0.789    | NEDD9       | 1.063    |
| CASP2       | 0.41     | LGALS3      | 1.195    | IGFBP6      | 0.781    | BGN         | 0.999    |
| DIABLO      | 0.34     | DAP         | 1.185    | LEF1        | 0.765    | PLAT        | 0.862    |
| TIMP3       | 0.301    | CASP3       | 1.129    | PAK1        | 0.714    | TIMP2       | 0.838    |
| TIMP2       | 0.298    | CCND1       | 1.116    | RARA        | 0.711    | PPP2R5B     | 0.785    |
| CASP7       | 0.291    | JUN         | 1.084    | GADD45A     | 0.644    | CASP8       | 0.782    |
| FEZ1        | 0.278    | PMAIP1      | 1.007    | SATB1       | 0.628    | CCND2       | 0.753    |
| BCL2L1      | 0.265    | NEDD9       | 0.938    | CASP2       | 0.586    | PDGFRB      | 0.737    |
| NEDD9       | 0.256    | TIMP2       | 0.937    | PSEN2       | 0.468    | TIMP3       | 0.716    |
| CTNNA1      | 0.218    | ISG20       | 0.926    | TSPO        | 0.451    | CDKN1B      | 0.542    |
| BAX         | -0.168   | DCN         | 0.912    | HMGB2       | 0.448    | SLC20A1     | 0.531    |
| IRF1        | -0.172   | ROCK1       | 0.861    | LMNA        | -0.436   | DIABLO      | 0.506    |
| BCAP31      | -0.173   | CASP2       | 0.844    | IRF1        | -0.442   | CASP7       | 0.491    |
| IGF2R       | -0.18    | GSR         | -0.426   | DFFA        | -0.459   | ERBB3       | 0.472    |
| IFNGR1      | -0.191   | GCH1        | -0.431   | RHOB        | -0.509   | RHOB        | 0.463    |
| GSN         | -0.219   | BGN         | -0.446   | IFITM3      | -0.536   | FDXR        | 0.384    |
| ROCK1       | -0.219   | BAX         | -0.45    | SC5D        | -0.609   | RARA        | 0.376    |
| CD38        | -0.224   | IFITM3      | -0.453   | BGN         | -0.612   | GPX1        | -0.417   |
| DNM1L       | -0.228   | GPX4        | -0.46    | DNM1L       | -0.625   | GSR         | -0.427   |
| PPT1        | -0.276   | RARA        | -0.461   | CASP6       | -0.632   | BNIP3L      | -0.427   |
| SPTAN1      | -0.277   | CDKN1A      | -0.463   | DNAJC3      | -0.647   | BMP2        | -0.49    |
| SC5D        | -0.278   | SLC20A1     | -0.472   | KRT18       | -0.666   | IGF2R       | -0.494   |
| CFLAR       | -0.285   | FDXR        | -0.488   | ISG20       | -0.67    | HMGB2       | -0.503   |
| GPX4        | -0.289   | IGF2R       | -0.545   | CFLAR       | -0.671   | IFNGR1      | -0.514   |
| TNFRSF12A   | -0.293   | PLAT        | -0.55    | BMP2        | -0.684   | SMAD7       | -0.543   |
| ERBB3       | -0.305   | IGFBP6      | -0.592   | SQSTM1      | -0.761   | SQSTM1      | -0.552   |
| IFITM3      | -0.332   | SATB1       | -0.611   | RETSAT      | -0.831   | ROCK1       | -0.56    |
| HSPB1       | -0.351   | CDC25B      | -0.663   | TIMP1       | -0.877   | CYLD        | -0.645   |
| IER3        | -0.352   | IRF1        | -0.688   | ROCK1       | -0.893   | SOD1        | -0.696   |
| CDK2        | -0.363   | MGMT        | -0.709   | CD38        | -0.94    | KRT18       | -0.707   |
| GSR         | -0.365   | SOD1        | -0.72    | TGFB3       | -0.94    | CFLAR       | -0.719   |
| RETSAT      | -0.375   | RETSAT      | -0.764   | BTG2        | -1.001   | CLU         | -0.729   |
| BCL2L2      | -0.393   | BIK         | -0.891   | DAP         | -1.059   | CASP6       | -0.735   |
| CASP6       | -0.409   | HSPB1       | -0.921   | PDCD4       | -1.066   | BAX         | -0.749   |
| ANKH        | -0.427   | SQSTM1      | -0.923   | IGF2R       | -1.207   | AIFM3       | -0.762   |
| TIMP1       | -0.444   | EMP1        | -0.947   | CLU         | -1.22    | BCL2L2      | -0.793   |
| GNA15       | -0.444   | TIMP1       | -0.988   | SAT1        | -1.281   | GADD45A     | -0.834   |
| BTG2        | -0.521   | PLCB2       | -1.183   | SMAD7       | -1.284   | GADD45B     | -0.845   |
| GADD45B     | -0.548   | GSTM1       | -1.214   | GPX3        | -1.416   | TSPO        | -0.966   |
| CLU         | -0.554   | CLU         | -1.22    | NEDD9       | -1.448   | PDCD4       | -1.077   |
| PLCB2       | -0.595   | ERBB3       | -1.263   | GADD45B     | -1.538   | IRF1        | -1.114   |
| SOD1        | -0.602   | TNFRSF12A   | -1.302   | EMP1        | -1.546   | TGFB2       | -1.158   |
| HMOX1       | -0.608   | KRT18       | -1.386   | ATF3        | -1.607   | SAT1        | -1.183   |
| H1-O        | -0.613   | F2          | -1.447   | HMOX1       | -1.646   | LGALS3      | -1.294   |
| CDKN1A      | -0.614   | GADD45B     | -1.643   | HSPB1       | -1.74    | GPX3        | -1.3     |
| SQSTM1      | -0.757   | TAP1        | -1.656   | IER3        | -1.798   | MGMT        | -1.31    |
| SMAD7       | -0.766   | SMAD7       | -1.773   | GSN         | -1.906   | IFITM3      | -1.375   |
| MGMT        | -0.77    | HMOX1       | -2.45    | PLAT        | -1.921   | F2          | -1.403   |
| PDCD4       | -0.798   | GNA15       | -2.72    | ANXA1       | -2.257   | BTG2        | -1.432   |
| KRT18       | -0.867   | GPX1        | -3.487   | LGALS3      | -2.371   | IER3        | -1.472   |
| GPX1        | -1.054   |             |          | F2          | -2.447   | CDKN1A      | -1.545   |
| GSTM1       | -1.09    |             |          | GSTM1       | -2.531   | GSN         | -1.557   |
| F2          | -1.102   |             |          | GPX1        | -3.228   | CDK2        | -1.599   |
| TAP1        | -1.153   |             |          |             |          | GSTM1       | -1.677   |
|             |          |             |          |             |          | ANXA1       | -1.799   |
|             |          |             |          |             |          | PMAIP1      | -2.077   |
|             |          |             |          |             |          | ISG20       | -2.499   |
|             |          |             |          |             |          | DCN         | -3.063   |

\* RM score; rank metric score.

**Video S1: 3D reconstruction of wild-type embryo at E8.5**

**Video S2: 3D reconstruction of *Sephs1*<sup>-/-</sup> embryo at E8.5**

**Video S3: 3D reconstruction of wild-type embryo at E9.5**

**Video S4: 3D reconstruction of *Sephs1*<sup>-/-</sup> embryo at E9.5**
